# Supplementary material for: Nmf9 Encodes a Highly Conserved Protein Important to Neurological Function in Mice and Flies
Source: PLoS Genet. 2015 Jul 1;11(7):e1005344. doi: 10.1371/journal.pgen.1005344 (PMC4488434; doi:10.1371/journal.pgen.1005344)
Supplement: S6 Table — (XLSX) [file pgen.1005344.s006.xlsx]

## Sheet: S6 Table
Oligo Purpose	Oligo Name	Sequence
Cas9 mRNA Synthesis
Cas9 Amplification	Cas9_F	TAATACGACTCACTATAGGGAGAATGGACTATAAGGACCACGAC
Cas9 Amplification	Cas9_R	GCGAGCTCTAGGAATTCTTAC
Mouse CRISPR Oligos
sgRNA Template	T7sgNMF_Template	AAAAGCACCGACTCGGTGCCACTTTTTCAAGTTGATAACGGACTAGCCTTATTTTAACTTGCTATTTCTAGCTCTAAAACGGTGAGAGCCGCTGATGGCTCCTATAGTGAGTCGTATTA
sgRNA Amplification	T7_sgNMF9_amp	TAATACGACTCACTATAGGAGCCATC
sgRNA Amplification (All)	sgREV	AAAAGCACCGACTCGGTG
HDR Oligo	G_to_A	TTGCCCTACAGGATATTCTGTCCTACCACAAGAGGAGCCATCAGCGGCTCTCACCCGCACTGTATCTAGGTTACCTAAAGCTGTGTAGCTCTGTGGATCAG
HDR Oligo	Y_to_A	TTGCCCTACAGGATATTCTGTCCTACCACAAGAGGAGCCATCAGCGGCTCTCACCCGGACTGGCTCTAGGTTACCTAAAGCTGTGTAGCTCTGTGGATCAG
HDR Oligo	K_to_A	TTGCCCTACAGGATATTCTGTCCTACCACAAGAGGAGCCATCAGCGGCTCTCACCCGGACTGTATCTAGGTTACCTAGCGCTGTGTAGCTCTGTGGATCAG
Fly CRISPR Oligos
sgRNA Template (ANK1)	DmANK1_REV	AAAAGCACCGACTCGGTGCCACTTTTTCAAGTTGATAACGGACTAGCCTTATTTTAACTTGCTATTTCTAGCTCTAAAACCCGACGTAGATGTAAACAGCCTATAGTGAGTCGTATTAGGTACCCG
sgRNA Template (FN3)	DmFN3_REV	AAAAGCACCGACTCGGTGCCACTTTTTCAAGTTGATAACGGACTAGCCTTATTTTAACTTGCTATTTCTAGCTCTAAAACGCACAGAGGTTCGATAGGTCCTATAGTGAGTCGTATTAGGTACCCG
sgRNA Template (CD2)	T7_CG6954.R	AAAAGCACCGACTCGGTGCCACTTTTTCAAGTTGATAACGGACTAGCCTTATTTTAACTTGCTATTTCTAGCTCTAAAACGGCTCCAAACGCTGCAGCGCCTATAGTGAGTCGTATTA
sgRNA Amplification (CD2)	T7_Cg6954_Amp	TAATACGACTCACTATAGGCGCTGCAG
sgRNA Amplification (FN3/ANK1)	T7.For	CGGGTACCTAATACGACTCACTATA
CD2 HDR Oligo	Dm_noY_target	GAGCTGCTCATCTCCTCGATTGGAGATCAATTGCACTATCAACAGGCGGCGCTGCAGCGTCTTGAGCCCGGTCTTGCGCTGGGCGCGCTAAAGATGCAATGCTCCATAGACCAGATCCAGGTGGTTGTGCCCGTGAAAACGCCGAAT
FN3 HDR Oligo	DMFN3-HDR-1	AGTGTCACATATCGGGCCTCACCCAGGGTCGTCGCTACTTCCTGCGAGCCGCGTGCGGCAATGTGAAGGCTGCAGGCACCTATCGAACCAGTGTGCCGGCTAGTGTAGTGCCCTCAAGTGAGTTGAATCCAATATTTAAATAGGCACTGTTTTTAATTG
FN3 HDR Oligo	DMFN3-HDR-2	AGTGTCACATATCGGGCCTCACCCAGGGTCGTCGCTACTTCCTGCGAGCCGCGTGCGGCAATGTGAAGGGATGGGGCACCTATCGAACCAGTGTGGCTGCTAGTGTAGTGCCCTCAAGTGAGTTGAATCCAATATTTAAATAGGCACTGTTTTTAATTG
